# Supplementary material
Source: PubMed Central journal article supplement (PMC8957604)
Supplement: NIHMS1769510-supplement-1.pdf [file NIHMS1769510-supplement-1.pdf]

**Supplemental Table 1. Association between glycemic status and physical function over time: results from multivariate linear mixed models**

| Variables                         | Grip strength                  |                  | Gait speed                     |                  |
|-----------------------------------|--------------------------------|------------------|--------------------------------|------------------|
|                                   | Coef. (95% CI)                 | p-value          | Coef. (95% CI)                 | p-value          |
| Age, years                        | <b>-0.223 (-0.269, -0.177)</b> | <b>&lt;0.001</b> | <b>-0.004 (-0.005, -0.003)</b> | <b>&lt;0.001</b> |
| <b>Glycemic status</b>            |                                |                  |                                |                  |
| <i>Normal</i>                     | Ref                            |                  | Ref                            |                  |
| <i>IFG*time</i>                   | -0.091 (-0.203, 0.020)         | 0.109            | -0.000 (-0.003, 0.003)         | 0.922            |
| <i>Controlled DM*time</i>         | 0.002 (-0.199, 0.202)          | 0.985            | -0.004 (-0.009, 0.001)         | 0.167            |
| <i>Uncontrolled DM*time</i>       | 0.174 (-0.084, 0.432)          | 0.186            | -0.002 (-0.008, 0.005)         | 0.601            |
| <b>HIV</b>                        | 0.438 (-0.311, 1.188)          | 0.251            | -0.003 (-0.017, 0.011)         | 0.703            |
| <b>Time since baseline, years</b> | <b>0.263 (0.181, 0.345)</b>    | <b>&lt;0.001</b> | <b>0.005 (0.003, 0.006)</b>    | <b>&lt;0.001</b> |

**Supplemental Table 2. Association between glycemic status and physical function: results from univariate linear mixed models**

| Variables                       | Grip strength                  |                  | Gait speed                     |                  |
|---------------------------------|--------------------------------|------------------|--------------------------------|------------------|
|                                 | Coef. (95% CI)                 | p-value          | Coef. (95% CI)                 | p-value          |
| <b>Age, years</b>               | <b>-0.267 (-0.281, -0.252)</b> | <b>&lt;0.001</b> | <b>-0.006 (-0.006, -0.006)</b> | <b>&lt;0.001</b> |
| <b>Glycemic status</b>          |                                |                  |                                |                  |
| <i>Normal</i>                   | Ref                            |                  | Ref                            |                  |
| <i>IFG</i>                      | 0.175 (-0.003, 0.353)          | 0.054            | <b>0.012 (0.008, 0.017)</b>    | <b>&lt;0.001</b> |
| <i>Controlled DM</i>            | <b>-0.663 (-1.021, -0.305)</b> | <b>&lt;0.001</b> | -0.008 (-0.018, 0.001)         | 0.093            |
| <i>Uncontrolled DM</i>          | <b>-1.568 (-2.091, -1.046)</b> | <b>&lt;0.001</b> | <b>-0.018 (-0.032, -0.004)</b> | <b>0.012</b>     |
| <b>HIV</b>                      | <b>0.740 (0.180, 1.301)</b>    | <b>0.010</b>     | <b>-0.016 (-0.027, -0.004)</b> | <b>0.007</b>     |
| <b>BMI (class)</b>              |                                |                  |                                |                  |
| <i>underweight/normal</i>       | ref                            |                  | ref                            |                  |
| <i>overweight</i>               | <b>0.712 (0.481, 0.944)</b>    | <b>&lt;0.001</b> | -0.001 (-0.007, 0.005)         | 0.815            |
| <i>obese</i>                    | <b>0.638 (0.299, 0.976)</b>    | <b>&lt;0.001</b> | <b>-0.027 (-0.035, -0.018)</b> | <b>&lt;0.001</b> |
| <b>Race</b>                     |                                |                  |                                |                  |
| <i>White</i>                    | ref                            |                  | ref                            |                  |
| <i>Black</i>                    | 0.629 (-0.119, 1.378)          | 0.099            | <b>-0.047 (-0.061, -0.033)</b> | <b>&lt;0.001</b> |
| <i>Others</i>                   | -1.531 (-2.785, -0.278)        | 0.017            | -0.021 (-0.045, 0.002)         | 0.079            |
| <b>College education</b>        | 0.134 (-0.259, 0.528)          | 0.504            | <b>0.023 (0.013, 0.032)</b>    | <b>&lt;0.001</b> |
| <b>Center</b>                   |                                |                  |                                |                  |
| <i>Baltimore</i>                | ref                            |                  | ref                            |                  |
| <i>Chicago</i>                  | <b>1.416 (0.430, 2.401)</b>    | <b>0.005</b>     | 0.003 (-0.015, 0.022)          | 0.725            |
| <i>Pittsburgh</i>               | <b>1.691 (0.781, 2.600)</b>    | <b>&lt;0.001</b> | <b>-0.029 (-0.046, -0.012)</b> | <b>0.001</b>     |
| <i>Los Angeles</i>              | -0.117 (-1.008, 0.774)         | 0.797            | <b>-0.044 (-0.060, -0.027)</b> | <b>&lt;0.001</b> |
| <b>Cohort</b>                   |                                |                  |                                |                  |
| <i>1984</i>                     | ref                            |                  | ref                            |                  |
| <i>1987</i>                     | 0.934 (-0.486, 2.353)          | 0.197            | -0.003 (-0.031, 0.024)         | 0.803            |
| <i>2001</i>                     | <b>1.839 (1.109, 2.568)</b>    | <b>&lt;0.001</b> | -0.008 (-0.021, 0.006)         | 0.285            |
| <i>2010</i>                     | <b>2.694 (1.683, 3.705)</b>    | <b>&lt;0.001</b> | -0.011 (-0.031, 0.008)         | 0.263            |
| <b>Smoking status</b>           |                                |                  |                                |                  |
| <i>Never</i>                    | ref                            |                  | ref                            |                  |
| <i>Former</i>                   | <b>-0.673 (-1.309, -0.036)</b> | <b>0.038</b>     | <b>-0.043 (-0.056, -0.030)</b> | <b>&lt;0.001</b> |
| <i>Current</i>                  | 0.115 (-0.544, 0.773)          | 0.733            | <b>-0.031 (-0.045, -0.018)</b> | <b>&lt;0.001</b> |
| <b>History of cocaine use</b>   | -0.463 (-0.931, 0.005)         | 0.052            | <b>-0.015 (-0.026, -0.005)</b> | <b>0.004</b>     |
| <b>History of marijuana use</b> | <b>-0.665 (-1.139, -0.191)</b> | <b>0.006</b>     | <b>-0.015 (-0.026, -0.004)</b> | <b>0.008</b>     |
| <b>Alcohol use</b>              |                                |                  |                                |                  |
| <i>None</i>                     | ref                            |                  | ref                            |                  |
| <i>Low-moderate</i>             | <b>0.770 (0.511, 1.028)</b>    | <b>&lt;0.001</b> | <b>0.024 (0.017, 0.031)</b>    | <b>&lt;0.001</b> |
| <i>Moderate-binge</i>           | <b>1.029 (0.723, 1.336)</b>    | <b>&lt;0.001</b> | <b>0.028 (0.020, 0.036)</b>    | <b>&lt;0.001</b> |
| <b>Liver disease</b>            | <b>-0.929 (-1.835, -0.024)</b> | <b>0.044</b>     | <b>-0.060 (-0.083, -0.037)</b> | <b>&lt;0.001</b> |
| <b>Kidney disease</b>           | <b>-0.913 (-1.147, -0.679)</b> | <b>&lt;0.001</b> | <b>-0.021 (-0.027, -0.015)</b> | <b>&lt;0.001</b> |
| <b>Hypertension</b>             | <b>-0.533 (-0.714, -0.352)</b> | <b>&lt;0.001</b> | <b>-0.024 (-0.029, -0.019)</b> | <b>&lt;0.001</b> |
| <b>Arthritis</b>                | -0.094 (-0.300, 0.488)         | 0.640            | -0.006 (-0.017, 0.004)         | 0.246            |

|                                             |                                |                  |                                |                  |
|---------------------------------------------|--------------------------------|------------------|--------------------------------|------------------|
| <b>Depression (CESD<math>\geq</math>16)</b> | <b>-0.250 (-0.442, -0.057)</b> | <b>0.011</b>     | <b>-0.015 (-0.020, -0.010)</b> | <b>&lt;0.001</b> |
| <b>Testosterone use</b>                     | <b>0.744 (0.249, 1.239)</b>    | <b>0.003</b>     | 0.000 (-0.012, 0.012)          | 0.990            |
| <b>Hepatitis B infection</b>                | <b>1.616 (0.248, 2.984)</b>    | <b>0.021</b>     | -0.009 (-0.041, 0.023)         | 0.582            |
| <b>Hepatitis C infection</b>                | <b>-1.849 (-2.847, -0.851)</b> | <b>&lt;0.001</b> | <b>-0.065 (-0.087, -0.043)</b> | <b>&lt;0.001</b> |
